# Supplementary material for: Bacterial symbionts use a type VI secretion system to eliminate competitors in their natural host
Source: PubMed Central journal article supplement — Proc Natl Acad Sci U S A. 2018 Aug 20;115(36):E8528–37. doi: 10.1073/pnas.1808302115 (PMC6130350; doi:10.1073/pnas.1808302115), 2018-08-20
Supplement: pnas.1808302115.sapp.pdf [file pnas.1808302115.sapp.pdf]

**Figure S1**

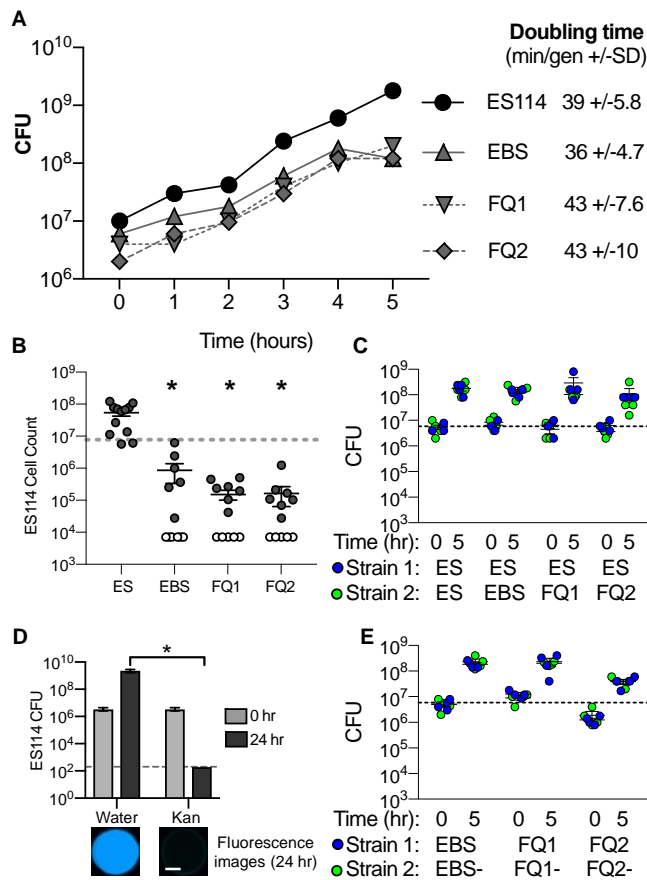

**Figure S1. Competitive *V. fischeri* strains eliminate ES114 in a contact-dependent manner.** (A) Growth curves of ES114 and lethal squid 1 (EBS) and squid 2 (FQ1 and FQ2) isolates; growth rates calculated with data from 2 to 4 h for all strains. (B) Flow cytometry cell count data of GFP-tagged ES114 after 5 h co-incubation with lethal squid isolates. Dashed line indicates average ES114 CFU at 0 h. White circles indicate cell counts at or under the limit of detection (7140 cells) and asterisks indicate statistical difference for ES114 co-incubated with other strains compared to with itself at 5 h using a student's t-test ( $p < 0.01$ ). (C) CFU counts for each co-incubation spot for co-incubations of ES114 (blue) with lethal squid isolates (green) where strains were physically separated by a  $0.22 \mu\text{m}$  filter preventing direct cell-cell contact but still allowing diffusion of molecules. (D) CFU counts for each co-incubation spot for co-incubations of ES114 at 0 h (light gray) and after 24 h (dark gray) when incubated with water or kanamycin separated by a  $0.22 \mu\text{m}$  filter. Fluorescence microscopy images were taken at 24 h; scale bar = 2 mm. Asterisk indicates statistical difference for ES114 incubated in water compared to kanamycin using a student's t-test ( $p = 0.0004$ ). The dashed line indicates the limit of detection (200 CFUs) for the assay. (E) CFU counts for each co-incubation spot for co-incubations of lethal wild-type strains (blue) with the *vasA\_2* mutant derivative strain. Error bars indicate the standard error of the mean for biological replicates. Each experiment was performed at least three times and either combined data are shown (B and D,  $n = 12$ ) or a representative experiment is shown (A,  $n = 1$ ; C and E,  $n = 4$ ).

Figure S2

Fluorescence images of ES114  
(blue) vs Other (green) at 24 h

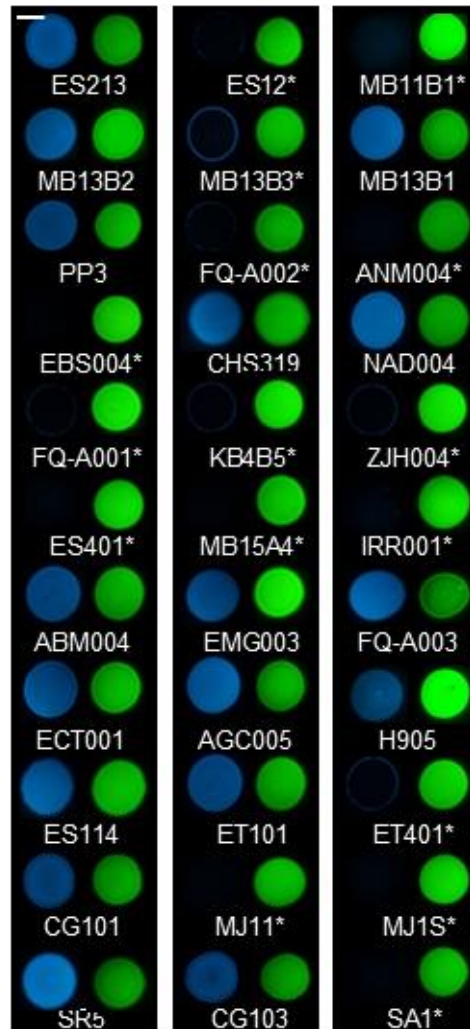

**Figure S2. Co-incubations between *V. fischeri* isolates and ES114.** Fluorescent microscopy images of co-incubations of GFP-tagged ES114 (blue) with 32 RFP-tagged *V. fischeri* isolates (green) taken at 24 h. Strains were mixed in a 1:5 ratio outnumbering ES114. Scale bar = 2 mm. RFP-tagged co-incubated strains are listed below the image pair. If ES114 (blue) is observed and not inhibited (ex. ES213), then the co-incubated strain is designated as non-lethal. If ES114 is not observed (ex. with ES12 or MB11B1), or if ES114 is only observed as outgrowth of survivors around the colony edge (ex: with MB13B3) then the co-incubated strain is designated as lethal.

**Figure S3**

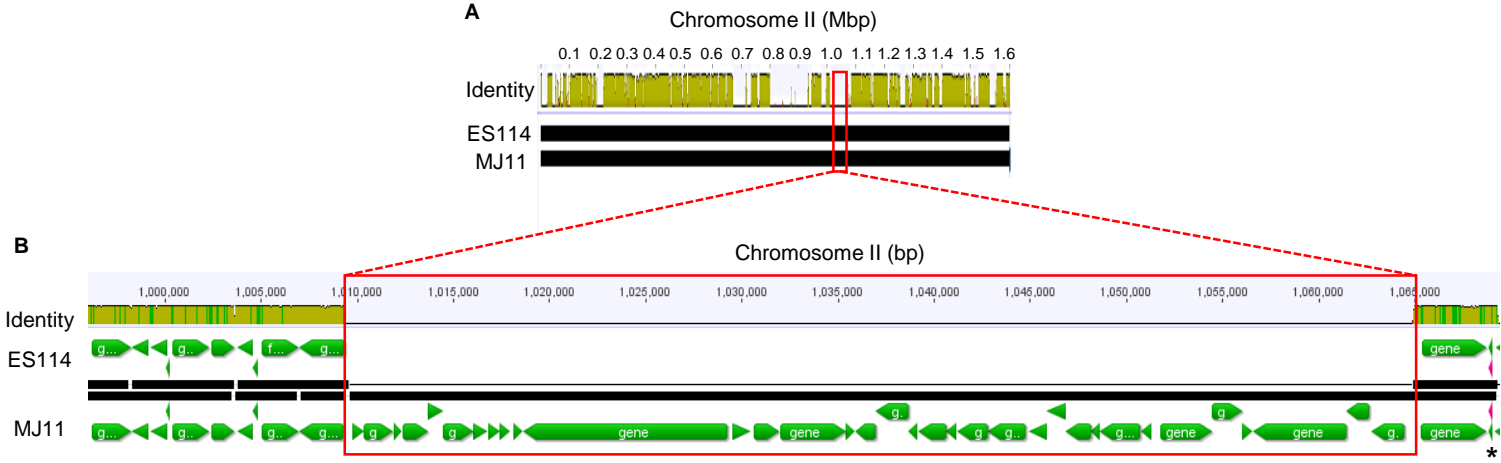

**Figure S3. Comparison of chromosome II for ES114 and MJ11.** Geneious R8 software was used to align the genomes of ES114 and MJ11 and visualized using Mauve. (A) Alignment of chromosome II sequences for ES114 (NC\_006841.2) and MJ11 (NC\_011186.1). Regions with high identity (yellow) indicate conserved genes and low identity (white) are strain specific. (B) Enlargement of T6SS2-encoding genomic island that is absent in ES114 but present in MJ11 shows it is near a tRNA gene (asterisk).

Figure 4

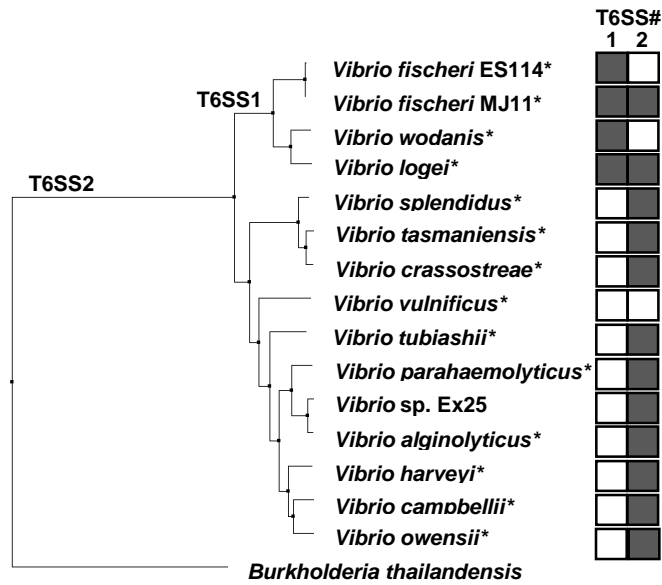

**Figure S4. T6SS2 is broadly conserved among *Vibrio* species.** Hsp60 percent identity tree for fully-sequenced representative genomes of *Vibrio* species. Filled boxes indicate presence of T6SS1 or T6SS2 IcmF homolog based on >60% identity (Table S2). Genomes were also examined for conserved genetic structure of T6SS. Asterisks indicate species found associated with an animal host. Note this figure only identifies homologs of T6SS1 and T6SS2 from *V. fischeri* and does not include other more distantly related T6SSs that may be in these representative genomes.

# Figure S5

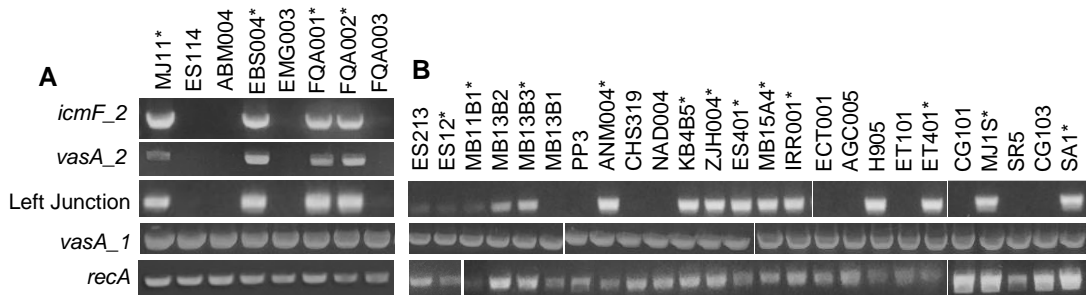

**Figure S5. Distribution of the T6SS1 and T6SS2 among *V. fischeri* isolates.** Strains were screened for the presence/absence of structural T6SS2 genes (*icmF\_2* and *vasA\_2*), the genomic island's left junction using primers specific to the left flanking gene and the first gene encoded in the genomic island, a structural T6SS1 gene *vasA\_1*, and housekeeping gene *recA*, which is present in all strains. Asterisks indicate lethal strains.

**Figure S6**

**A** Auxiliary gene cluster 1

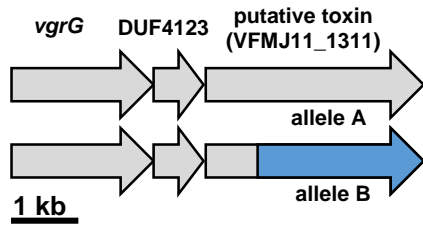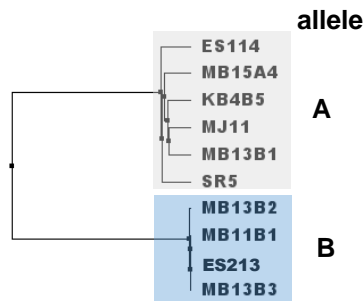

allele

**A**

**B**

Allele A genes share >93% ID and allele B genes share >99.9% seq identity. Allele A and Allele B sequences share ~60% sequence identity. The first 791 bp share >93% sequence identity and after 791 the two alleles share ~48% sequence identity. A Pfam search returned no significant predicted functional domains for either allele.

Auxiliary gene cluster 2

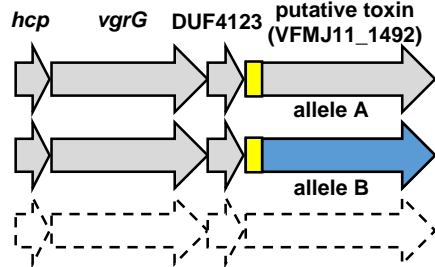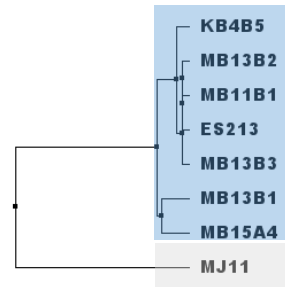

allele

**B**

**A**

Allele B genes share >93% seq identity. Allele A and Allele B sequences share ~60% sequence identity. The first 155 bp share >94% sequence identity and after 155 bp the two alleles share ~58% sequence identity. A Pfam search returned a conserved LysM domain at the N terminus of both alleles (yellow). Homologs of auxiliary gene cluster 2 were not detected in ES114 or SR5.

Auxiliary gene cluster 3

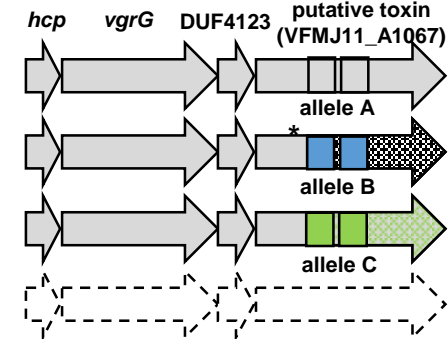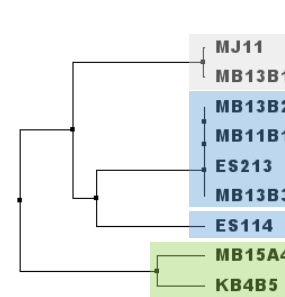

allele

**A**

**B**

**B\***

**C**

Allele A sequences share >99.9% sequence identity. Allele B sequences are 100% identical and B\* allele for ES114 is 93% identical to the other B alleles, however it is distinct and has a stop codon. Allele C sequences share 97% sequence identity. All three alleles have two DUF2235 domains that are uncharacterized alpha/beta hydrolase domains (boxes). The three alleles share a highly conserved N-terminus sequence (>94% ID), while the DUF2236 domains are least similar (78-85% ID) and a more conserved C-terminus domain (88-94% ID). Homologs of auxiliary gene cluster 3 were not detected in SR5.

Primary T6SS2 operon

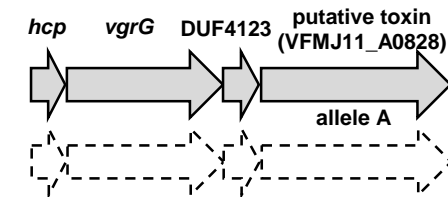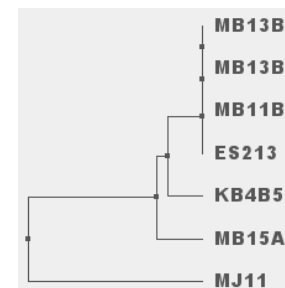

allele

**A**

All sequences share >96% identity. No significant predicted functional domains were identified from a Pfam search. The T6SS2 operon was not detected in ES114, SR5, or MB13B1.

**B** Predicted Compatibility Table

| Strain | Group | A1 | A2 | A3 | P  | killer |
|--------|-------|----|----|----|----|--------|
| ES213  | 1     | B  | B  | B  | A  | No     |
| MB11B1 | 1     | B  | B  | B  | A  | Yes    |
| MB13B2 | 1     | B  | B  | B  | A  | No     |
| MB13B3 | 1     | B  | B  | B  | A  | Yes    |
| MB13B1 | 2     | A  | B  | A  | NP | No     |
| KB4B5  | 3     | A  | B  | C  | A  | Yes    |
| MB15A4 | 3     | A  | B  | C  | A  | Yes    |
| ES114  | 4     | A  | NP | B* | NP | No     |
| MJ11   | 5     | A  | A  | A  | A  | Yes    |
| SR5    | 6     | A  | NP | NP | NP | No     |

NP indicates the gene cluster was not detected either bioinformatically or with PCR.

**C**

Fluorescence Images (24 h)

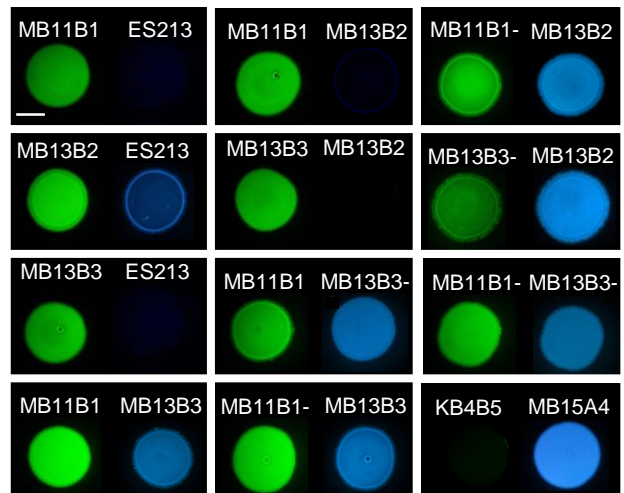

**Figure S6. T6SS toxin genotypes of 10 *V. fischeri* isolates.** (A) Putative T6SS toxin alleles of 10 *V. fischeri* strain draft genomes for auxiliary gene clusters 1 (A1), 2 (A2), 3 (A3) and the primary T6SS2 operon (P). Protein sequences from the *V. fischeri* MJ11 genome were used to perform a tblastn search for homologs which were aligned using clustal omega, and an average distance tree was built using jalview. (B) Predicted compatibility table showing 6 compatibility groups based on toxin alleles; NP (not present) indicates absence of a gene cluster. (C) Fluorescence microscopy images for pairwise co-incubations of Group 1 and Group 3 strains taken at 24 h; “-” indicates *vasA\_2* mutants; scale bar is 2 mm.

Figure S7

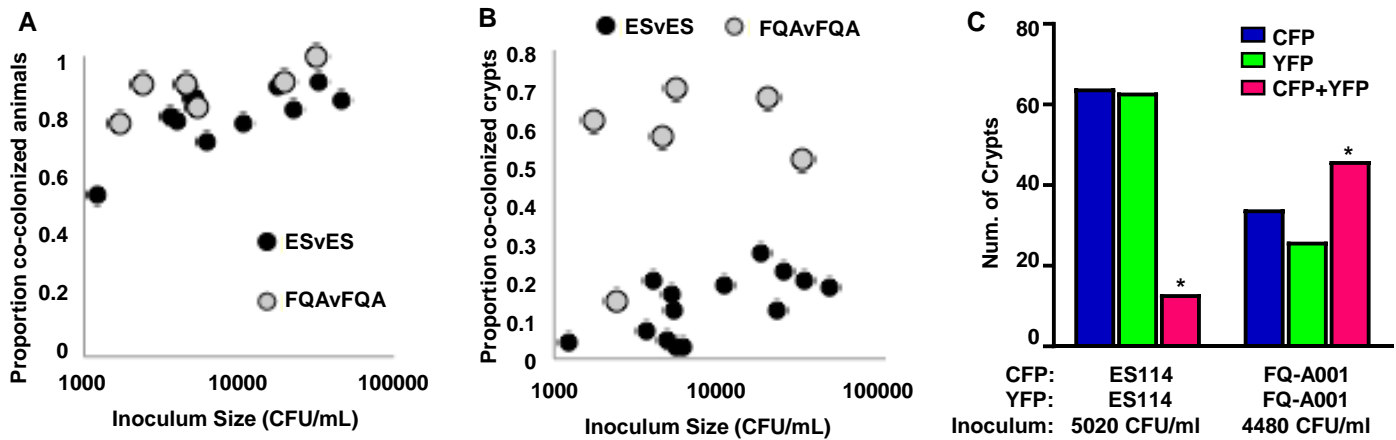

**Figure S7. Inoculum size correlates with co-colonized animals.** (A) Scatter plot showing calculated frequency of co-colonized squid light organs for animals exposed to ES114 differentially expressing CFP or YFP (ESvES) and animals exposed to FQA001 differentially expressing CFP or YFP (FQAvFQA) at various inoculum sizes. The frequencies of co-colonized animals were determined by dividing the number of animals with both YFP- and CFP-positive infections by the total number of animals in the group. (B) Scatter plot showing the calculated frequency of co-colonized crypts. Proportions of co-colonized crypts were determined by dividing the number of crypts that were positive for both CFP and YFP by the total number of crypts that were CFP positive. (C) Number of crypts that were scored as CFP only, YFP only, or CFP+YFP for competitions using CFP- and YFP-tagged ES114 ( $n = 29$  animals) or CFP- and YFP-tagged FQ-A001 ( $n = 22$  animals) at indicated inoculation sizes. The proportion of CFP+ YFP+ crypts between the different competitions were compared using a two-proportion z-test and an asterisk indicates  $p < 0.001$ .



Table S1. Type VI Secretion System 2 Genes in MJ11 Genome

| VFMJ11# | Vas name  | Other name                              | Predicted Function                                      | % AA identity between T6SS1 and T6SS2 gene clusters |
|---------|-----------|-----------------------------------------|---------------------------------------------------------|-----------------------------------------------------|
| A0803   |           | Flanking Gene                           |                                                         |                                                     |
| A0804   |           |                                         |                                                         |                                                     |
| A0805   | VasC      | ImpI, TagH*                             |                                                         | 24% to VFMJ11_1079                                  |
| A0806   | VasD      | SciN*, TssJ*, EvpL*                     | (core component)                                        | 28% to VFMJ11_1078                                  |
| A0807   | VasE      | ImpJ, SciO*, TssK*, EvpM*               | (core component)                                        | 34% to VFMJ11_1077                                  |
| A0808   | VasF      | ImpK, TssL‡, IcmH‡, DotU‡, SciP*, EvpN* | (core component)                                        | 30% to VFMJ11_1076                                  |
| A0809   |           |                                         | Conserved hypothetical protein                          |                                                     |
| A0810   |           |                                         | Hypothetical protein                                    |                                                     |
| A0811   |           |                                         | Conserved hypothetical protein                          |                                                     |
| A0812   |           |                                         | Conserved hypothetical protein                          |                                                     |
| A0813   |           |                                         | Hypothetical protein                                    |                                                     |
| A0814   |           |                                         | Putative lipoprotein                                    |                                                     |
| A0815   |           |                                         | M23 peptidase domain protein                            |                                                     |
| A0816   | VasL      | ImpA, SciA*, EvpK* (((TssA)             | ImpA-related N-terminal family protein (core component) | Absent in T6SS1                                     |
| A0817   | VasK/IcmF | ImpL, TssM‡, SciS*, EvpO*               | Membrane transport protein ... (core component)         | 24% to VFMJ11_1075                                  |
| A0818   |           |                                         | Putative transcriptional regulator                      |                                                     |
| A0819   | VasB      | ImpH, TssG*, AciB*, EmpG*               | Baseplate (core component)                              | 33% to VFMJ11_1083                                  |
| A0820   | VasA      | ImpG, TssF‡, SciC*, EvpF*               | Baseplate (core component)                              | 34% to VFMJ11_1084                                  |
| A0821   | VasS      |                                         | Lysozyme-related protein (core component)               | 37% to VFMJ11_1085                                  |
| A0822   | VipB      | ImpC, TssB‡                             | Outer sheath (core component)                           | 67% to VFMJ11_1086                                  |
| A0823   | VipA      | ImpB, TssC‡                             | Outer sheath (core component)                           | 57% to VFMJ11_1087                                  |
| A0824   | VasJ      | ImpA, DapB, SciA, EvpK                  | (core component)                                        | 25% to VFMJ11_1088                                  |
| A0825   |           |                                         | Serine-threonine protein kinase                         |                                                     |
| A0826   |           |                                         | Conserved hypothetical protein                          |                                                     |
| A0827   |           |                                         | Conserved hypothetical protein                          |                                                     |
| A0828   |           |                                         | Conserved hypothetical protein                          |                                                     |
| A0829   |           |                                         | Conserved hypothetical protein                          |                                                     |
| A0830   | VgrG      | TssI‡, VgrS*                            | Spiked tip (core component)                             | Absent in T6SS1                                     |
| A0831   | Hcp       | TssD‡, SciK*, SciM*, EvpC*              | Inner tube (core component)                             | Absent in T6SS1                                     |
| A0832   | VasG      | ClpV, SciG*, TssH*, EvpH*               | (core component)                                        | 53% to VFMJ11_1082                                  |
| A0833   |           |                                         | Nitric Oxide reductase regulator                        |                                                     |

|       |          |               |                                   |  |
|-------|----------|---------------|-----------------------------------|--|
| A0834 |          |               | Putative lipoprotein              |  |
| A0835 |          | OmpA          | OmpA family protein               |  |
| A0836 |          |               | Putative lipoprotein              |  |
| A0837 |          |               | Conservative hypothetical protein |  |
| A0838 |          | Flanking Gene | Chitodextrinase                   |  |
| A0839 | tRNA-Gly |               | Aminoacyl-tRNA biosynthesis       |  |

‡ Cianfanelli, F.R., Monlezun, L. and Coulthurst, S.J., 2016. Aim, load, fire: the type VI secretion system, a bacterial nanoweapon. *Trends in microbiology*, 24(1), pp.51-62.

\*Cascales, E., 2008. The type VI secretion toolkit. *EMBO reports*, 9(8), pp.735-741.

**Supplemental Table S2.** Distribution of *V. fischeri* T6SS2-encoded proteins among *Vibrio* spp.

| <i>Vibrio</i> species         | MJ11_A0817 homolog | % ID <sup>a</sup> | MJ11_A0818 homolog | % ID <sup>a</sup> | Ref. <sup>b</sup> |
|-------------------------------|--------------------|-------------------|--------------------|-------------------|-------------------|
| <i>V. fischeri</i> *          | ACH63505.1         | 100%              | ACH63887.1         | 100%              | (1)               |
| <i>V. logei</i> *             | WP_017020851.1     | 80%               | WP_065611695.1     | 89%               | (2)               |
| <i>V. wodanis</i> *           | WP_061004504.1     | 80%               | WP_061004503.1     | 87%               | (3)               |
| <i>V. proteolyticus</i> *     | WP_040902488.1     | 66%               | GAD67006.1         | 78%               | (4)               |
| <i>V. jasicida</i> *          | WP_038878560.1     | 64%               | WP_045410168.1     | 56%               | (5)               |
| <i>V. crassostreae</i> *      | WP_017064525.1     | 63%               | OEE92195.1         | 76%               | (6)               |
| <i>V. tasmaniensis</i> *      | WP_065104332.1     | 63%               | WP_012600854.1     | 77%               | (7)               |
| <i>V. splendidus</i> *        | WP_054543291.1     | 63%               | KPL96954.1         | 76%               | (8)               |
| <i>V. campbellii</i> *        | WP_005532464.1     | 63%               | WP_005427005.1     | 74%               | (9)               |
| <i>V. harveyi</i> *           | WP_045491053.1     | 63%               | AIV08715.1         | 74%               | (10)              |
| <i>V. alginolyticus</i> *†    | WP_065645837.1     | 63%               | EAS76637.1         | 73%               | (8)               |
| <i>V. parahaemolyticus</i> *† | WP_053807876.1     | 63%               | WP_005480668.1     | 72%               | (11)              |
| <i>V. antiquarius</i>         | WP_006741088.1     | 63%               | EDN58559.1         | 73%               | (12)              |
| <i>V. owensii</i> *           | WP_041052795.1     | 62%               | KIF49344.1         | 74%               | (13)              |
| <i>V. tubiashii</i> *         | WP_004749068.1     | 62%               | WP_004743867.1     | 71%               | (14)              |
| <i>V. azureus</i>             | WP_021710015.1     | 61%               | WP_021710014.1     | 71%               | (15)              |
| <i>V. caribbeanicus</i> *     | WP_009603313.1     | 60%               | WP_009603314.1     | 72%               | (16)              |
| <i>V. coralliilyticus</i> *   | WP_045985165.1     | 58%               | EEX32044.1         | 75%               | (17)              |
| <i>V. neptunius</i> *         | WP_045976861.1     | 58%               | WP_045976860.1     | 75%               | (18)              |

<sup>a</sup>Percent identity based on BlastP results using VFMJ11\_A0817 (IcmF\_2) and VFMJ11\_A0818 as sequence query.

<sup>b</sup>Reference for host association or isolation

\* Indicates species is associated with a marine host

† Indicates species is associated with human host

### References:

- Boettcher KJ & Ruby EG (1990) Depressed light emission by symbiotic *Vibrio fischeri* of the sepiolid squid *Euprymna scolopes*. *J Bacteriol* 172(7):3701-3706.
- Fidopiastis PM, von Boletzky S, & Ruby EG (1998) A new niche for *Vibrio logei*, the predominant light organ symbiont of squids in the genus *Sepioloa*. *J Bacteriol* 180(1):59-64.
- Hjerde E, et al. (2015) Co-cultivation and transcriptome sequencing of two co-existing fish pathogens *Moritella viscosa* and *Aliivibrio wodanis*. *BMC Genomics* 16.
- Ray A, et al. (2016) Proteomics Analysis Reveals Previously Uncharacterized Virulence Factors in *Vibrio proteolyticus*. *Mbio* 7(4).
- Yoshizawa S, et al. (2012) *Vibrio jasicida* sp nov., a member of the Harveyi clade, isolated from marine animals (packhorse lobster, abalone and Atlantic salmon). *Int J Syst Evol Microbiol* 62:1864-1870.

6. Bruto M, *et al.* (2017) *Vibrio crassostreae*, a benign oyster colonizer turned into a pathogen after plasmid acquisition. *Isme J* 11(4):1043-1052.
7. Thompson FL, Thompson CC, & Swings J (2003) *Vibrio tasmaniensis* sp nov., isolated from Atlantic Salmon (*Salmo salar* L.). *Syst Appl Microbiol* 26(1):65-69.
8. Gomez-Leon J, Villamil L, Lemos ML, Novoa B, & Figueras A (2005) Isolation of *Vibrio alginolyticus* and *Vibrio splendidus* from aquacultured carpet shell clam (*Ruditapes decussatus*) larvae associated with mass mortalities. *Appl Environ Microbiol* 71(1):98-104.
9. Wang LP, *et al.* (2015) Isolation and identification of *Vibrio campbellii* as a bacterial pathogen for luminous vibriosis of *Litopenaeus vannamei*. *Aquac Res* 46(2):395-404.
10. Austin B & Zhang XH (2006) *Vibrio harveyi*: a significant pathogen of marine vertebrates and invertebrates. *Lett Appl Microbiol* 43(2):119-124.
11. Wang RZ, *et al.* (2015) The pathogenesis, detection, and prevention of *Vibrio parahaemolyticus* (vol 6, 144, 2015). *Front Microbiol* 6.
12. Hasan NA, *et al.* (2015) Deep-sea hydrothermal vent bacteria related to human pathogenic *Vibrio* species. *Proc Natl Acad Sci U S A* 112(21):E2813-E2819.
13. Goulden EF, Hall MR, Bourne DG, Pereg LL, & Hoj L (2012) Pathogenicity and Infection Cycle of *Vibrio owensii* in Larviculture of the Ornate Spiny Lobster (*Panulirus ornatus*). *Appl Environ Microbiol* 78(8):2841-2849.
14. Hasegawa H, Lind EJ, Boin MA, & Hase CC (2008) The extracellular metalloprotease of *Vibrio tubiashii* is a major virulence factor for Pacific oyster (*Crassostrea gigas*) larvae. *Appl Environ Microbiol* 74(13):4101-4110.
15. Yoshizawa S, *et al.* (2009) *Vibrio azureus* sp nov., a luminous marine bacterium isolated from seawater. *Int J Syst Evol Micr* 59:1645-1649.
16. Hoffmann M, *et al.* (2012) *Vibrio caribbeanicus* sp nov., isolated from the marine sponge *Scleritoderma cyanea*. *Int J Syst Evol Micr* 62:1736-1743.
17. Ushijima B, *et al.* (2014) *Vibrio coralliilyticus* Strain OCN008 Is an Etiological Agent of Acute Montipora White Syndrome. *Appl Environ Microbiol* 80(7):2102-2109.
18. Thompson FL, *et al.* (2003) *Vibrio neptunius* sp nov., *Vibrio brasiliensis* sp nov and *Vibrio xuii* sp nov., isolated from the marine aquaculture environment (bivalves, fish, rotifers and shrimps). *Int J Syst Evol Micr* 53:245-252.

**Table S3.** Type VI Secretion System Auxiliary Gene Clusters in MJ11 Genome

| VFMJ11# | Vas name | Other name                 | Auxiliary gene cluster | % AA identity between MJ11 and ES114 |
|---------|----------|----------------------------|------------------------|--------------------------------------|
| 1309    | VgrG     | TssI‡, VgrS*               | Auxiliary cluster I    | 93% to VF_1229                       |
| 1310    |          | DUF4123 domain protein     | Auxiliary cluster I    | 93% to VF_1230                       |
| 1311    |          | Conserved hypothetical     | Auxiliary cluster I    | 94% to VF_1231                       |
| 1312    |          | Conserved hypothetical     | Auxiliary cluster I    | 79% to VF_1232                       |
| 1313    |          | Conserved hypothetical     | Auxiliary cluster I    | 77% to VF_1233                       |
| 1314    |          | Conserved hypothetical     | Auxiliary cluster I    | 82% to VF_1232                       |
| 1315    |          | Conserved hypothetical     | Auxiliary cluster I    | 87% to VF_1232                       |
| 1316    |          | Conserved hypothetical     | Auxiliary cluster I    | 78% to VF_1233                       |
| 1495    | Hcp      | TssD‡, SciK*, SciM*, EvcC* | Auxiliary cluster II   | Absent in ES114                      |
| 1494    | VgrG     | TssI‡, VgrS*               | Auxiliary cluster II   | Absent in ES114                      |
| 1493    |          | DUF4123 domain protein     | Auxiliary cluster II   | Absent in ES114                      |
| 1492    |          | LysM domain protein        | Auxiliary cluster II   | Absent in ES114                      |
| A1070   | Hcp      | TssD‡, SciK*, SciM*, EvcC* | Auxiliary cluster III  | 100% to VF_A0954                     |
| A1069   | VgrG     | TssI‡, VgrS*               | Auxiliary cluster III  | 99% to VF_A0953                      |
| A1068   |          | DUF4123 domain protein     | Auxiliary cluster III  | 97% to VF_A0952                      |
| A1067   |          | DUF2235 domain protein     | Auxiliary cluster III  | 86% to VF_A0950                      |
| A1066   |          | DUF2931 domain protein     | Auxiliary cluster III  | 72% to VF_A0945                      |

**Table S4.** Impact of T6SS2 on proportion of co-colonized animals

|                                 | <b>ES v FQ1<br/>Trial 1</b> | <b>ES v FQ1-<br/>Trial 1</b> | <b>ES v FQ1<br/>Trial 2</b> | <b>ES v FQ1-<br/>Trial2</b> |
|---------------------------------|-----------------------------|------------------------------|-----------------------------|-----------------------------|
| <b>Co-colonized<br/>animals</b> | 24                          | 20                           | 24                          | 22                          |
| <b>Total Squid</b>              | 30                          | 24                           | 26                          | 27                          |
| <b>Proportion</b>               | 0.80                        | 0.92                         | 0.83                        | 0.81                        |
| <b>P value by z test</b>        | 0.107                       |                              | 0.424                       |                             |

**Table S5.** Statistical analysis of co-colonized crypts

| Strains in inoculum               | Trial 1   |         | Trial 2   |         |
|-----------------------------------|-----------|---------|-----------|---------|
|                                   | ES114vFQA | ESvFQA- | ES114vFQA | ESvFQA- |
| CFP+ crypts                       | 370       | 68      | 470       | 87      |
| CFP+YFP+ crypts                   | 10        | 12      | 10        | 17      |
| Proportion                        | 0.027     | 0.176   | 0.021     | 0.195   |
| <i>p</i> -value by z-test         | <0.001    |         | <0.001    |         |
| Proportion needed for power = 0.8 | 0.105     |         | 0.099     |         |
| Effect size                       | 0.369     |         | 0.4106    |         |

**Supplemental Table S6.** General information about *Vibrionaceae* strains used in this study.

| Strain <sup>1</sup>      | Collection Description                           |                                                                        | Source or Reference          | NCBI GenBank Accession Numbers |                      |                       |                       |
|--------------------------|--------------------------------------------------|------------------------------------------------------------------------|------------------------------|--------------------------------|----------------------|-----------------------|-----------------------|
|                          | Geography                                        | Ecology                                                                |                              | <i>recA</i>                    | <i>mdh</i>           | <i>katA</i>           | <i>pyrC</i>           |
| ABM004 <sup>2</sup>      | Oahu, HI, USA<br>(Maunalua Bay)                  | <i>Euprymna scolopes</i><br>(squid light organ)<br>Aquarium seawater   | This study                   | MF076795                       | MF076808             | MF076821              | MF076834              |
| AGC005 <sup>3</sup>      | State College,<br>PA, USA                        | containing <i>E.</i><br><i>scolopes</i> collected<br>from Maunalua Bay | ""                           | MF076800                       | MF076813             | MF076826              | MF076839              |
| ANM004 <sup>3</sup>      | Oahu, HI, USA<br>(Maunalua Bay)                  | <i>E. scolopes</i><br>(squid light organ)                              | ""                           | MF076798                       | MF076811             | MF076824              | MF076837              |
| CG101                    | Australia                                        | <i>Cleidopus gloriamaris</i><br>(fish light organ)                     | (Lee 1994)                   | HQ595306                       | EU907966             | EU907990              | JF509856              |
| CG103                    | ""                                               | ""                                                                     | ""                           | HQ595307                       | HQ595322             | HQ595331              | JF509855              |
| CHS319 <sup>2</sup>      | Oahu, HI, USA<br>(Maunalua Bay)                  | <i>E. scolopes</i><br>(squid light organ)                              | This study                   | MF076801                       | MF076814             | MF076827              | MF076840              |
| EBS004 <sup>2</sup>      | ""                                               | ""                                                                     | ""                           | MF076797                       | MF076810             | MF076823              | MF076836              |
| ECT001 <sup>2</sup>      | ""                                               | ""                                                                     | ""                           | MF076804                       | MF076817             | MF076830              | MF076843              |
| EMG003 <sup>2</sup>      | ""                                               | ""                                                                     | ""                           | MF076796                       | MF076809             | MF076822              | MF076835              |
| ES12                     | Oahu, HI, USA<br>(Kaneohe Bay)                   | ""                                                                     | (Boettcher and<br>Ruby 1994) | HQ595309                       | HQ595323             | HQ595332              | JF509862              |
| ES114;<br>ATCC<br>700601 | ""                                               | ""                                                                     | (Boettcher and<br>Ruby 1990) | VF_0535 <sup>5</sup>           | VF_0276 <sup>5</sup> | VF_A0009 <sup>5</sup> | VF_A0412 <sup>5</sup> |
| ES213                    | Oahu, HI, USA<br>(Maunalua Bay)                  | ""                                                                     | (Boettcher and<br>Ruby 1994) | HQ595310                       | EU907971             | EU907995              | JF509863              |
| ES401                    | ""                                               | ""                                                                     | (Lee 1994)                   | HQ595311                       | HQ595324             | HQ595333              | JF509864              |
| ET101                    | Victoria,<br>Australia<br>(Crib Point)           | <i>Euprymna tasmanica</i><br>(squid light organ)                       | (Nishiguchi<br>2002)         | HQ595312                       | HQ595325             | HQ595334              | JF509865              |
| ET401                    | Townsville,<br>Australia<br>(Magnetic<br>Island) | ""                                                                     | (Nishiguchi<br>2002)         | HQ595313                       | HQ595326             | HQ595335              | JF509866              |



|                                          |                                 |                                                        |                                  |                          |                          |                           |                           |
|------------------------------------------|---------------------------------|--------------------------------------------------------|----------------------------------|--------------------------|--------------------------|---------------------------|---------------------------|
| FQ-A001                                  | Oahu, HI, USA<br>(Kaneohe Bay)  | <i>E. scolopes</i><br>(squid light organ)              | (Sun Miyashiro<br>2016)          | KU756584                 | KU756585                 | KU756586                  | KU756587                  |
| FQ-A002 <sup>2</sup>                     | ""                              | ""                                                     | This Study                       | MF076793                 | MF076806                 | MF076819                  | MF076832                  |
| FQ-A003 <sup>2</sup>                     | ""                              | ""                                                     | ""                               | MF076794                 | MF076807                 | MF076820                  | MF076833                  |
| H905                                     | ""                              | Planktonic                                             | (Lee and Ruby<br>1992)           | HQ595314                 | EU907972                 | EU907996                  | JF509867                  |
| IRR001 <sup>3</sup>                      | ""                              | <i>E. scolopes</i><br>(squid light organ)              | This Study                       | MF076799                 | MF076812                 | MF076825                  | MF076838                  |
| KB4B5                                    | ""                              | ""                                                     | (Wollenberg<br>and Ruby<br>2009) | JF509762                 | JF509787                 | JF509845                  | JF509873                  |
| LFI1238<br>( <i>V.<br/>salmonicida</i> ) | Hammerfest,<br>Norway           | <i>Gadus morhua</i><br>(cod head kidney)               | (Hjerde et al<br>2008)           | VSAL_I0634 <sup>5</sup>  | VSAL_I0359 <sup>5</sup>  | VSAL_II0215 <sup>5</sup>  | VSAL_II0468 <sup>5</sup>  |
| MB11B1                                   | Oahu, HI, USA<br>(Maunalua Bay) | <i>E. scolopes</i><br>(squid light organ)              | (Wollenberg<br>and Ruby<br>2009) | JF509765                 | JF509789                 | JF509847                  | JF509876                  |
| MB13B1                                   | ""                              | ""                                                     | (Wollenberg<br>and Ruby<br>2009) | JF509766                 | JF509790                 | JF509848                  | JF509877                  |
| MB13B2                                   | ""                              | ""                                                     | (Wollenberg<br>and Ruby<br>2009) | JF509767                 | JF509791                 | JF509849                  | JF509878                  |
| MB13B3                                   | ""                              | ""                                                     | (Wollenberg<br>and Ruby<br>2009) | JF509768                 | JF509792                 | JF509850                  | JF509879                  |
| MB15A4                                   | ""                              | ""                                                     | (Wollenberg<br>and Ruby<br>2009) | JF509771                 | JF509793                 | JF509851                  | JF509882                  |
| MJ1S <sup>2</sup>                        | Japan                           | <i>Monocentris<br/>japonicus</i> (fish light<br>organ) | (Bose Stabb<br>2011?)            | MF076792                 | MF076805                 | MF076818                  | MF076831                  |
| MJ11                                     | Japan                           | <i>Monocentris<br/>japonicus</i><br>(fish light organ) | (Ruby and<br>Nealson 1976)       | VFMJ11_0538 <sup>5</sup> | VFMJ11_0264 <sup>5</sup> | VFMJ11_A0023 <sup>5</sup> | VFMJ11_A0452 <sup>5</sup> |
| NAD004 <sup>2</sup>                      | Oahu, HI, USA                   | <i>E. scolopes</i>                                     | This Study                       | MF076802                 | MF076815                 | MF076828                  | MF076841                  |

|                            |                                                  |                                               |                             |          |          |          |          |
|----------------------------|--------------------------------------------------|-----------------------------------------------|-----------------------------|----------|----------|----------|----------|
| PP3                        | (Maunalua Bay)<br>Oahu, HI, USA<br>(Kaneohe Bay) | (squid light organ)<br>Planktonic             | (Lee and Ruby<br>1992)      | HQ595317 | HQ595329 | HQ595338 | JF509893 |
| SA1                        | Banyuls sur<br>Mer, France                       | <i>Sepiola affinis</i><br>(squid light organ) | (Fidopiastis et<br>al 1998) | HQ595318 | EU907986 | EU908010 | JF509894 |
| SA6<br>( <i>V. logei</i> ) | ""                                               | ""                                            | (Fidopiastis et<br>al 1998) | JF509782 | JF509796 | JF509854 | JF509895 |
| SR5                        | ""                                               | <i>Sepiola robusta</i><br>(squid light organ) | (Fidopiastis et<br>al 1998) | HQ595319 | EU907987 | EU908011 | JF509896 |
| ZJH004 <sup>2</sup>        | Oahu, HI, USA<br>(Maunalua Bay)                  | <i>E. scolopes</i><br>(squid light organ)     | This Study                  | MF076803 | MF076816 | MF076829 | MF076842 |

<sup>1</sup> All strains are *V. fischeri* unless otherwise noted.

<sup>2</sup> Sequences collected in this study by PCR and Sanger sequencing.

<sup>3</sup> Sequences collected in this study by next-generation sequencing via the Illumina platform.

**Supplemental Table S7. Strains, Plasmids, Oligo table**

| Strains or Plasmids                   | Relevant characteristics                                                                                                                                                       | Source or Ref.         |
|---------------------------------------|--------------------------------------------------------------------------------------------------------------------------------------------------------------------------------|------------------------|
| <b><i>E. coli</i></b>                 |                                                                                                                                                                                |                        |
| DH5 $\alpha$                          | F'/ <i>endA1 hsdR17 glnV44 thi-1 recA1 gyrA relA1</i> $\Delta$ ( <i>lacIZYA-argF</i> )U169 <i>deoR</i> (f80 <i>dlacI</i> $\Delta$ ( <i>lacZ</i> )M15)                          | (Hanahan, 1983)        |
| DH5 $\alpha$ <i>pir</i>               | <i>λpir</i> derivative of DH5 $\alpha$                                                                                                                                         | (Dunn et al., 2005)    |
| CC118 $\lambda$ <i>pir</i>            | $\Delta$ ( <i>ara-leu</i> ) <i>araD</i> $\Delta$ <i>lac74 galE galK phoA20 thi-1 rpsE rpsB argE</i> (Am) <i>recA λpir</i>                                                      | (Herrero et al., 1990) |
| <b><i>V. fischeri</i><sup>a</sup></b> |                                                                                                                                                                                |                        |
| ANS2098                               | FQ-A001 with <i>vasA_2</i> disruption (Erm <sup>R</sup> )                                                                                                                      | This study             |
| ANS2099                               | FQ-A002 with <i>vasA_2</i> disruption (Erm <sup>R</sup> )                                                                                                                      | This study             |
| LAS003                                | EBS004 with <i>vasA_2</i> disruption (Erm <sup>R</sup> )                                                                                                                       | This study             |
| LAS005                                | FQ-A001 with <i>vasA_1</i> disruption (Erm <sup>R</sup> )                                                                                                                      | This study             |
| LAS006                                | MB11B1 with <i>vasA_2</i> disruption (Erm <sup>R</sup> )                                                                                                                       | This study             |
| LAS007                                | MB13B3 with <i>vasA_2</i> disruption (Erm <sup>R</sup> )                                                                                                                       | This study             |
| <b>Plasmids</b>                       |                                                                                                                                                                                |                        |
| pAS2038                               | <i>vasA_2</i> disruption vector; <i>oriV<sub>R6K<math>\gamma</math></sub></i> , <i>oriT</i> , Erm <sup>R</sup>                                                                 | This study             |
| pLS04                                 | <i>vasA_1</i> disruption vector; <i>oriV<sub>R6K<math>\gamma</math></sub></i> , <i>oriT</i> , Erm <sup>R</sup>                                                                 | This study             |
| pSNS116                               | <i>vasAB_2</i> complementation vector; <i>oriV<sub>R6K<math>\gamma</math></sub></i> , <i>oriV<sub>pES213</sub></i> , <i>oriT</i> , Kn <sup>R</sup>                             | This study             |
| pSNS119                               | <i>vipA_2-gfp</i> fusion vector; <i>oriV<sub>R6K<math>\gamma</math></sub></i> , <i>oriV<sub>pES213</sub></i> , <i>oriT</i> , Kn <sup>R</sup>                                   | This study             |
| pSCV38                                | <i>P<sub>tetA-yfp</sub></i> , <i>P<sub>tetA-mCherry</sub></i> , <i>oriV<sub>R6K<math>\gamma</math></sub></i> , <i>oriV<sub>pES213</sub></i> , <i>oriT</i> , Cm <sup>R</sup>    | Sun et al., 2016       |
| pYS112                                | <i>P<sub>proD-cfp</sub></i> , <i>P<sub>tetA-mCherry</sub></i> , <i>oriV<sub>R6K<math>\gamma</math></sub></i> , <i>oriV<sub>pES213</sub></i> , <i>oriT</i> , Cm <sup>R</sup>    | Sun et al., 2016       |
| pEVS104                               | conjugative helper, <i>oriV<sub>R6K<math>\gamma</math></sub></i> , <i>oriT</i> , Kn <sup>R</sup>                                                                               | Stabb & Ruby, 2002     |
| pAKD601                               | <i>lacIq</i> and IPTG-inducible promoter with optional GFP fusion, <i>oriV<sub>R6K<math>\gamma</math></sub></i> , <i>oriV<sub>pES213</sub></i> , <i>oriT</i> , Kn <sup>R</sup> | Dunn and Stabb, 2008   |
| pEVS122                               | <i>oriV<sub>R6K<math>\gamma</math></sub></i> , <i>oriT</i> , Erm <sup>R</sup>                                                                                                  | Dunn et al., 2005      |
| pVSV102                               | <i>gfp+</i> , <i>oriV<sub>R6K<math>\gamma</math></sub></i> , <i>oriV<sub>pES213</sub></i> , <i>oriT</i> , Kn <sup>R</sup>                                                      | Dunn et al., 2006      |
| pVSV208                               | <i>dsRed+</i> , <i>oriV<sub>R6K<math>\gamma</math></sub></i> , <i>oriV<sub>pES213</sub></i> , <i>oriT</i> , Cm <sup>R</sup>                                                    | Dunn et al., 2006      |
| <b>Oligonucleotides<sup>b</sup></b>   |                                                                                                                                                                                |                        |
| AS1146                                | TAGGTACCCTGATGTTGAACGCTTATTAG                                                                                                                                                  | This study             |
| AS1147                                | ATGCATGCAGATACTTGATTGTTATGCG                                                                                                                                                   | This study             |
| AS1064                                | ATGGTACCCAAGCAGACCTACGTTTATTATGGG                                                                                                                                              | This study             |
| AS1066                                | ATGGTACCTTAGAAAAAACTTCTCGAATATCAATGG                                                                                                                                           | This study             |
| AS1140-R                              | TATTAACCTACTACACATTAAACTG                                                                                                                                                      | This study             |
| AS1141-R                              | ATGATTCAATATATTGTTAATAAACC                                                                                                                                                     | This study             |
| AS1158                                | TGGCTCTGCATATAAATACGG                                                                                                                                                          | This study             |
| AS1159                                | TCACCTTTAGCAAATGCAGG                                                                                                                                                           | This study             |
| AS1204                                | GCGAATTCGAGCTCGGTACCAACGCTTAGATAACCAGTTACC                                                                                                                                     | This study             |
| AS1205                                | GACTCTAGAGGATCCCCGGGATAGATACGTATCAAAGTGCCC                                                                                                                                     | This study             |
| LS004                                 | TTCGAAGGGTTCGCTTTTTTAG                                                                                                                                                         | This study             |
| SNS56                                 | GTGGATCCGAGCTCGGTACCAAGGATGAATTATGTCACGTGATG<br>AGTTCTTCTCCTTTTCTCCTCCTGCTGCTGCGCTAGCTTCAGCCTTA                                                                                | This study             |
| SNS57                                 | GCTTCTTCTTTAG                                                                                                                                                                  | This study             |
| SNS41                                 | GTGGATCCGAGCTCGGTACCAGGAGTTAATAGTGAGCAATAGC                                                                                                                                    | This study             |
| SNS42                                 | TCTCCTTTGCTAGCTCTAGATTAGTTACTGCCTACTATTTTAATTTTCG                                                                                                                              | This study             |
| <i>recA</i> outer-F                   | GACGATAACAAGAAAAAAGCACTGG                                                                                                                                                      | Wollenberg 2012        |
| <i>recA</i> outer-R                   | CGTTTTCTTCAATTTTCWGGAGC                                                                                                                                                        | Wollenberg 2012        |
| <i>recA</i> inner-F                   | TGARAARCARTTYGGTAAAGG                                                                                                                                                          | Wollenberg 2012        |
| <i>recA</i> inner-R                   | GGAGCRGCATCAGTCTCTGG                                                                                                                                                           | Wollenberg 2012        |
| <i>mdh</i> outer-F                    | AAGTAGCTGTTATTGGTGC                                                                                                                                                            | Wollenberg 2012        |

|                     |                       |                 |
|---------------------|-----------------------|-----------------|
| <i>mdh</i> outer-R  | CTTCGCCAATTTTGATATCG  | Wollenberg 2012 |
| <i>mdh</i> inner-F  | GGCATTGGACAAGCGTTAGC  | Wollenberg 2012 |
| <i>mdh</i> inner-R  | CGCCTCTTAGCGTATCTAGC  | Wollenberg 2012 |
| <i>katA</i> outer-F | TGTCCTGTTGCACATAACC   | Wollenberg 2012 |
| <i>katA</i> outer-R | CGCTTACATCAATATCAAG   | Wollenberg 2012 |
| <i>katA</i> inner-F | CGTGGTATTCCTGCAACATAC | Wollenberg 2012 |
| <i>katA</i> inner-R | CCGATACCTTCACCATAAGC  | Wollenberg 2012 |
| <i>pyrC</i> outer-F | CTGATGATTGGCATTACAC   | Wollenberg 2012 |
| <i>pyrC</i> outer-R | GCCACTCAACAGCTTCACC   | Wollenberg 2012 |
| <i>pyrC</i> inner-F | CACTTACGTGATGGTGATGTG | Wollenberg 2012 |
| <i>pyrC</i> inner-R | GCCACTCAACAGCTTCACC   | Wollenberg 2012 |

---

<sup>a</sup>For complete list of *V. fischeri* strains used in this study see supplemental Table S6.

<sup>b</sup>Restriction sites are underlined.

## **Supplemental Methods for Speare *et al.***

**Media and growth conditions.** *V. fischeri* strains were grown in LBS medium (1) at 24°C and *E. coli* strains were grown in either LB medium (2) or Brain Heart Infusion (Difco) at 37°C. Antibiotic selection for *V. fischeri* and *E. coli* strains were as described previously (3). Plasmids with the R6K $\gamma$  origin of replication were maintained in *E. coli* strain DH5 $\alpha$  $\lambda$ pir (3) and plasmid pEVS104 (4) was maintained in strain CC118 $\lambda$ pir (5). All other plasmids were maintained in *E. coli* strain DH5 $\alpha$  (6).

**Isolation of symbiotic *V. fischeri*.** New *V. fischeri* isolates described in this study (Table S3) were isolated from *Euprymna scolopes* light organs. Briefly, adult *E. scolopes* squid were caught by dip-net in Kaneohe or Maunalua Bay, Oahu. After capture, animals were transported to a holding tank supplied with natural seawater. Adults were transported to Penn State where they were kept in an aquarium before anesthetizing, dissection, and plating of dilution series of light organ homogenate. Individual colonies were picked and re-streaked for purification.

**Strain and plasmid construction.** Bacterial strains, plasmids, and oligonucleotides used in this study are presented in Table S4. For mutant construction in *V. fischeri*, mutant alleles were mobilized on plasmids into recipients by triparental mating using CC118 $\lambda$ pir pEVS104 as a conjugative helper. Potential mutants were screened for appropriate antibiotic resistance markers and verified using PCR. All primer design was based on the MJ11 genome sequence. To construct the *vasA\_I* disruption mutant, approximately 1 kb of the *vasA\_I* gene was PCR amplified using primers AS1204 and AS1205 from FQ-A001 gDNA. The resulting PCR product was cloned into the KpnI and SphI sites of plasmid pEVS122, resulting in the *vasA\_I* disruption construct, pLS04.

The *vasA\_1* disruption construct on pLS04 was moved into strain FQ-A001, resulting in strains LAS005. To construct the *vasA\_2* disruption mutants, approximately 1 kb of the *vasA\_2* gene was PCR amplified using primers AS1146 and AS1147 from FQ-A001 gDNA. The resulting PCR product was cloned into the KpnI and SphI sites of plasmid pEVS122, resulting in the *vasA\_2* disruption construct, pAS2038. The *vasA\_2* disruption construct on pAS2038 was moved into strains FQ-A001, FQ-A002, EBS004, MB11B1, and MB13B3 resulting in strains ANS2098, ANS2099, LAS003, LAS006, and LAS007, respectively.

To construct the VipA-GFP fusion expression vector, *vipA\_2* was PCR-amplified from strain ES401 gDNA using primers SNS56 and SNS57. The forward primer includes 11 bp upstream of the *vipA\_2* start codon to include the native ribosome binding site (RBS). The reverse primer excluded the native stop codon for *vipA\_2* and a linker sequence was added (5' GCAGCAGCAGGAGGAGGA 3') for translational fusion of *vipA\_2* to the *gfp* gene encoded in pAKD601 (7). The *vipA\_2* PCR product was cloned into KpnI and NheI digested pAKD601 using the standard sequence- and ligation-independent cloning (SLIC) technique (8). The *vipA\_2-gfp* fusion in the resulting plasmid (pSNS119) is located downstream of an IPTG-inducible promoter.

To construct a complementation vector for the *vasA\_2* mutation, *vasAB\_2* was PCR-amplified from strain FQ-A001 gDNA using primers SNS41 and SNS42. The forward primer includes 11 bp upstream of the start codon to include the native RBS. The reverse primer included the native stop codon to prevent a translational fusion to, or expression of, the downstream *gfp* gene on pAKD601. The resulting *vasAB\_2* PCR product was cloned downstream of an IPTG-inducible promoter in plasmid pAKD601 (cut with KpnI and NheI) using the standard SLIC cloning technique (8), resulting in plasmid pSNS116.

**Single-cell Fluorescence Microscopy.** To visualize GFP-tagged T6SS2 sheath formation in *V. fischeri* cells, we used a single-cell fluorescence microscopy approach adapted from Basler et al., 2012 (9). Overnight cultures of *V. fischeri* wild-type FQ-A001, the *vasA\_1* mutant (LAS05), or the *vasA\_2* mutant (ANS2098) strains carrying the IPTG-inducible *vipA\_2-gfp* fusion expression vector (pSNS119) were diluted 1:100 into fresh LBS medium supplemented with 0.5 mM isopropyl- $\beta$ -D-1-thiogalactopyranoside (IPTG) and cultivated at 24°C with shaking for 2.5-3 hours to an OD600 of approximately 1.5. Cells from 5  $\mu$ L of these cultures were spotted onto a thin pad of LBS with 2% agar and 0.5 mM IPTG, covered with a glass cover slip and imaged after two hours at room temperature. Fluorescence images were captured using an Olympus BX51 microscope outfitted with a Hamamatsu C8484-03G01 camera and a 100X/1.30 Oil Ph3 objective lens. Images were captured using MetaMorph software. Contrast on images was adjusted uniformly across images by subtracting background using ImageJ software.

**Contact-dependent Co-incubation Assay.** To test for contact-dependent interactions, strains were prepared as described in the methods section, except strains were separated using a 0.22  $\mu$ m nitrocellulose membrane. Specifically, 5  $\mu$ l of each strain was spotted onto a membrane and allowed to dry. These membranes were placed directly on top of one another (alternating which strain was on the top and bottom membranes) and placed onto LBS agar plates and incubated at 24°C for 5 h. After 5 h, both membranes were removed from the plate and suspended in 3 mL LBS medium. Strain were quantified by plating serial dilutions for T0 and T5 onto selective LBS agar plates. For each experiment four independent cultures of each strain were assayed and each experiment was repeated three times.

**Squid Colonization Assays.** Overnight cultures of the indicated strains were diluted 1/100 into LBS supplemented with 2.5 µg/ml chloramphenicol and grown to OD<sub>600</sub> ~ 1.0. For each inoculum, cultures were diluted into filter-sterilized seawater (FSSW) and sampled for CFU. For each treatment, 24-30 freshly hatched juvenile squid were exposed to the inoculum containing an even mix of YFP- and CFP- labeled strains (using pSCV38 and pYS112, respectively) at a final concentration ranging from 1600 to 8240 CFU/ml. Squid were exposed to this mixed inoculum for 20 h and then washed in fresh FSSW. After 44 h, animals were fixed in 4% paraformaldehyde/marine phosphate buffered saline (mPBS) for 24 h at 4°C, then washed exhaustively in mPBS. Animals were prepared for fluorescence microscopy by dissecting the ventral side of the mantle and removing the siphon to reveal the light organ. YFP, CFP, and differential interference contrast (DIC) images were taken using a Zeiss 780 confocal microscope (Carl Zeiss AG, Jena, Germany) equipped with a 10x or 40x water lens. Each crypt space was scored separately for CFP and YFP fluorescence.

**Phylogenetic Analysis Details.** A multi-locus phylogenetic analysis was performed using partial sequences of four loci: *recA*, *mdh*, *katA*, and *pyrC*. Published sequence data and newly amplified sequences of 35 total *Vibrio* isolates were collected, aligned with ClustalX 2.1 (10), analyzed via three independent runs of 2,000 samples each in ClonalFrame 1.2 (11), and visualized with a consensus network in Splitstree 4.12.2 (12) as described previously (13, 14). The resulting consensus network showed little evidence of phylogenetic incongruence (so-called “splits” represented by parallelograms visualized among nodes in the network) among these four partial loci. Because the ClonalFrame/Splitstree analysis revealed little evidence of phylogenetic incongruence among these four partial loci, for each isolate the four partial sequences were



combined into a single concatenated sequence (ordered *recA mdh katA pyrC* – approximately 2880 nucleotides). Concatenated sequences were analyzed by jModelTest 2.1 v20160303 (15) via three information criteria methods (Akaike, Bayesian, and Decision Theory). The latter two methods calculated the lowest likelihood score for a transitional model with a gamma shape parameter and a proportion of invariable sites (TIM3+ $\Gamma$ +I) while a general time-reversible model with a gamma shape parameter and a proportion of invariable sites (GTR+ $\Gamma$ +I) was given the lowest likelihood score with the Akaike method.

TIM3+  $\Gamma$ +I evolutionary model parameter estimates calculated by jModelTest were used by the software program PAUP\*4.0b10 (16) to infer phylogenetic trees and bootstrap those trees via two methods: Maximum Parsimony (MP) and Maximum Likelihood (ML). ML phylogenetic inference and bootstrapping was performed by searching heuristically using simple addition and subtree pruning and regrafting for swaps, treating gaps as missing, and swapping on “best only” with 1000 replicates and 1000 bootstrap pseudoreplicates. MP phylogenetic inference and bootstrapping was performed by searching heuristically using simple addition and tree bisection reconnection for swaps, treating gaps as missing, and swapping on “best only” with 1000 replicates and 1000 bootstrap pseudoreplicates.

A Bayesian approach (Ba) to phylogenetic inference was also completed with the program MrBayes 3.1.2 (17) by setting the “nst” variable to “6” and the “rates” variable to “invgamma” (this approximates a GTR+ $\Gamma$ +I model); three heated chains were set using the “temp” variable to a value of 0.05 (to ensure appropriate chain swapping). Construction of the majority-rule consensus tree and statistical analysis of clade membership/presence was assessed by sampling an “appropriately stationary” posterior probability distribution. For the purposes of this study, an “appropriately stationary” distribution was defined, as recommended by Ronquist

and colleagues (18), as an average standard deviation of split frequencies of less than 0.01 for 70% to 90% of samples between two, independent Metropolis-coupled Markov Chain Monte Carlo runs. Approximately 3,000,000 total generations were sampled every 100 generations for a total of 30,000 samples – 10,000 of these samples were discarded via the “burnin” variable in MrBayes. Majority-rule consensus trees drawn from the resulting 20,000-sample, stationary distribution were used for the assessment of the posterior probabilities of all clades. The above methods were independently repeated twice; all three separate Ba “replicates” showed nearly identical phylogenetic patterns of clades and posterior probabilities. Sequences associated with this analysis were submitted to the GenBank database and their accession numbers are listed in Table S3.

#### **References:**

1. Stabb EV, Reich KA, & Ruby EG (2001) *Vibrio fischeri* genes *hvnA* and *hvnB* encode secreted NAD(+)-glycohydrolases. *J Bacteriol* 183(1):309-317.
2. Miller JH (1992) A Short Course in Bacterial Genetics. (Cold Spring Harbor Laboratory Press), p 456.
3. Dunn AK, Martin MO, & Stabb EV (2005) Characterization of pES213, a small mobilizable plasmid from *Vibrio fischeri*. *Plasmid* 54(2):114-134.
4. Stabb EV & Ruby EG (2002) RP4-based plasmids for conjugation between *Escherichia coli* and members of the *Vibrionaceae*. *Methods Enzymol* 358:413-426.
5. Herrero M, de Lorenzo V, & Timmis KN (1990) Transposon vectors containing non-antibiotic resistance selection markers for cloning and stable chromosomal insertion of foreign genes in gram-negative bacteria. *J Bacteriol* 172(11):6557-6567.

6. Hanahan D (1983) Studies on transformation of *Escherichia coli* with plasmids. *J Mol Biol* 166(4):557-580.
7. Dunn AK & Stabb EV (2008) The twin arginine translocation system contributes to symbiotic colonization of *Euprymna scolopes* by *Vibrio fischeri*. *FEMS Microbiol Lett* 279(2):251-258.
8. Li MZ, Elledge, S. J. (2012) SLIC: a method for sequence-and ligation-independent cloning. *Gene Synthesis*:51-59.
9. Basler M, Pilhofer M, Henderson GP, Jensen GJ, & Mekalanos JJ (2012) Type VI secretion requires a dynamic contractile phage tail-like structure. *Nature* 483(7388):182-U178.
10. Larkin MA, *et al.* (2007) Clustal W and clustal X version 2.0. *Bioinformatics* 23(21):2947-2948.
11. Didelot X & Falush D (2007) Inference of bacterial microevolution using multilocus sequence data. *Genetics* 175(3):1251-1266.
12. Huson DH & Bryant D (2006) Application of phylogenetic networks in evolutionary studies. *Mol Biol Evol* 23(2):254-267.
13. Sun Y, *et al.* (2016) Intraspecific Competition Impacts *Vibrio fischeri* Strain Diversity during Initial Colonization of the Squid Light Organ. *Appl Environ Microbiol* 82(10):3082-3091.
14. Wollenberg MS & Ruby EG (2012) Phylogeny and fitness of *Vibrio fischeri* from the light organs of *Euprymna scolopes* in two Oahu, Hawaii populations. *Isme J* 6(2):352-362.

15. Wollenberg MS & Ruby EG (2009) Population Structure of *Vibrio fischeri* within the Light Organs of *Euprymna scolopes* Squid from Two Oahu (Hawaii) Populations. *Appl Environ Microbiol* 75(1):193-202.
16. Darriba D, Taboada GL, Doallo R, & Posada D (2012) jModelTest 2: more models, new heuristics and parallel computing. *Nat Methods* 9(8):772-772.
17. Swofford DL (2002) *PAUP\*: phylogenetic analysis using parsimony (\*and other methods)* (Sinauer Associates, Sunderland, MA).
18. Huelsenbeck JP & Ronquist F (2001) MRBAYES: Bayesian inference of phylogenetic trees. *Bioinformatics* 17(8):754-755.
